# Supplementary material for: Mobility and social deprivation on primary care utilisation among paediatric patients with asthma
Source: HighWire-hosted journal article supplement (doi:10.1136/fmch-2021-001085), 2021-07-01
Supplement: fmch-2021-001085supp002_data_supplement.pdf [file fmch-2021-001085supp002_data_supplement.pdf]

**Appendix Table 1. Rate Ratios of Encounters and Influenza Vaccinations**

|                                            | <b>Encounters</b><br>(N=23,773)<br>RR (95% CI)% | <b>Influenza Vaccination</b><br>(N=20,984)<br>RR (95% CI) |
|--------------------------------------------|-------------------------------------------------|-----------------------------------------------------------|
| <b>Social Deprivation Mobility Group</b>   |                                                 |                                                           |
| Always low                                 | Ref                                             | Ref                                                       |
| Always high                                | <b>1.09 (1.02-1.17)</b>                         | <b>1.13 (1.03-1.23)</b>                                   |
| High-to-low                                | 1.00 (0.94-1.06)                                | 1.03 (0.95-1.12)                                          |
| Low-to-high                                | <b>1.05 (1.00-1.11)</b>                         | 1.04 (0.96-1.13)                                          |
| Varied                                     | 1.02 (0.95-1.11)                                | 1.08 (0.96-1.21)                                          |
| <b>Number of Residential Moves</b>         |                                                 |                                                           |
| 0                                          | Ref                                             | Ref                                                       |
| 1-2                                        | <b>0.91 (0.87-0.95)</b>                         | <b>0.93 (0.89-0.98)</b>                                   |
| 3 or more                                  | <b>0.85 (0.78-0.93)</b>                         | <b>0.80 (0.73-0.89)</b>                                   |
| <b>Race/Ethnicity</b>                      |                                                 |                                                           |
| Non-Hispanic White                         | Ref                                             | Ref                                                       |
| Latino                                     | <b>1.09 (1.01-1.17)</b>                         | <b>1.38 (1.23-1.54)</b>                                   |
| Non-Hispanic Black                         | <b>0.85 (0.78-0.93)</b>                         | <b>1.27 (1.06-1.51)</b>                                   |
| <b>Age at first encounter</b>              |                                                 |                                                           |
| 3-5 years                                  | Ref                                             | Ref                                                       |
| 6-11 years                                 | <b>0.90 (0.87-0.93)</b>                         | <b>0.72 (0.67-0.78)</b>                                   |
| 12-17 years                                | <b>1.14 (1.04-1.25)</b>                         | <b>0.80 (0.73-0.89)</b>                                   |
| <b>Sex</b>                                 |                                                 |                                                           |
| Female                                     | Ref                                             | Ref                                                       |
| Male                                       | <b>0.89 (0.87-0.92)</b>                         | 1.03 (0.99-1.06)                                          |
| <b>Insurance Type</b>                      |                                                 |                                                           |
| Some private insurance                     | Ref                                             | Ref                                                       |
| Never insured                              | 0.95 (0.78-1.16)                                | 0.98 (0.77-1.24)                                          |
| Some public and private                    | <b>1.18 (1.10-1.27)</b>                         | <b>0.71 (0.61-0.82)</b>                                   |
| Some public insurance                      | <b>1.10 (1.03-1.17)</b>                         | 0.90 (0.78-1.04)                                          |
| <b>BMI Category</b>                        |                                                 |                                                           |
| Never overweight/obese                     | Ref                                             | Ref                                                       |
| Sometimes overweight/obese                 | <b>1.17 (1.14-1.21)</b>                         | <b>0.93 (0.88-0.98)</b>                                   |
| Always overweight/obese                    | <b>1.09 (1.06-1.13)</b>                         | 0.97 (0.92-1.02)                                          |
| <b>Percent of US Federal Poverty Level</b> |                                                 |                                                           |
| Always ≥138                                | Ref                                             | Ref                                                       |
| Above & below 138                          | <b>1.09 (1.02-1.16)</b>                         | <b>0.74 (0.65-0.83)</b>                                   |
| Always <138                                | 1.06 (0.99-1.12)                                | <b>0.86 (0.77-0.95)</b>                                   |
| Not documented                             | <b>0.87 (0.79-0.96)</b>                         | <b>1.21 (1.01-1.45)</b>                                   |
| <b>Visits per Year</b>                     |                                                 |                                                           |
| Less than 1                                | N/A                                             | Ref                                                       |
| 1 to 2                                     | N/A                                             | 2.14 (1.93-2.39)                                          |
| 3 to 4                                     | N/A                                             | 3.40 (3.05-3.78)                                          |
| 5 or more                                  | N/A                                             | 5.26 (4.61-6.00)                                          |

**Appendix Table 2. Odds Ratios of Pneumococcal Vaccination Ever (within study period) (N=20,984)**

|                                            | <b>OR (95%CI)</b>       |
|--------------------------------------------|-------------------------|
| <b>Social Deprivation Mobility Group</b>   |                         |
| Always low                                 | Ref                     |
| Always high                                | 1.03 (0.93-1.15)        |
| High-to-low                                | 1.03 (0.88-1.21)        |
| Low-to-high                                | 1.15 (0.96-1.37)        |
| Varied                                     | 1.25 (0.98-1.60)        |
| <b>Number of Residential Moves</b>         |                         |
| 0                                          | Ref                     |
| 1-2                                        | <b>1.27 (1.15-1.41)</b> |
| 3 or more                                  | 0.92 (0.70-1.21)        |
| <b>Race/Ethnicity</b>                      |                         |
| Non-Hispanic White                         | Ref                     |
| Latino                                     | <b>1.23 (1.10-1.37)</b> |
| Non-Hispanic Black                         | <b>1.27 (1.10-1.47)</b> |
| <b>Sex</b>                                 |                         |
| Female                                     | Ref                     |
| Male                                       | <b>1.11 (1.03-1.19)</b> |
| <b>Insurance Type</b>                      |                         |
| Some private insurance                     | Ref                     |
| Never insured                              | 1.07 (0.75-1.52)        |
| Some public and private                    | <b>0.66 (0.48-0.89)</b> |
| Some public insurance                      | <b>1.41 (1.19-1.69)</b> |
| <b>Visits per Year</b>                     |                         |
| Less than 1                                | Ref                     |
| 1 to 2                                     | <b>1.73 (1.44-2.07)</b> |
| 3 to 4                                     | <b>2.59 (2.13-3.15)</b> |
| 5 or more                                  | <b>3.84 (3.15-4.69)</b> |
| <b>BMI Category</b>                        |                         |
| Never overweight/obese                     | Ref                     |
| Sometimes overweight/obese                 | <b>0.80 (0.72-0.89)</b> |
| Always overweight/obese                    | <b>0.45 (0.44-0.53)</b> |
| <b>Percent of US Federal Poverty Level</b> |                         |
| Always ≥138                                | Ref                     |
| Above & below 138                          | <b>0.60 (0.49-0.74)</b> |
| Always <138                                | 0.87 (0.72-1.04)        |
| Not documented                             | 0.92 (0.75-1.14)        |
