# Supplementary figures and images for: Mobility and social deprivation on primary care utilisation among paediatric patients with asthma
Source: HighWire-hosted journal article supplement (doi:10.1136/fmch-2021-001085), 2021-07-01

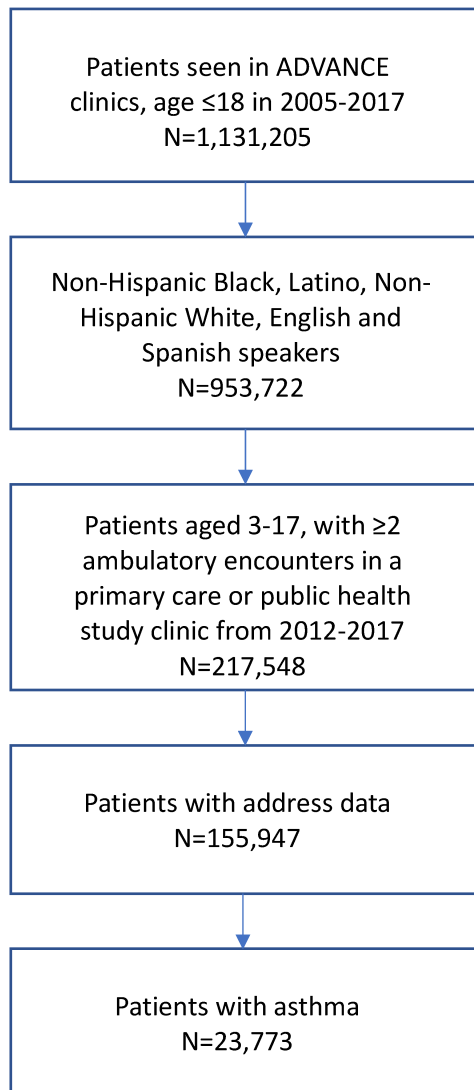

Appendix Figure 1. Selection of Analytic Sample

Supplement: fmch-2021-001085supp001_data_supplement.pdf [file fmch-2021-001085supp001_data_supplement.pdf]
